# Supplementary material for: Effects of Male Defendants’ Attractiveness and Trustworthiness on Simulated Judicial Decisions in Two Different Swindles
Source: Front Psychol. 2019 Sep 26;10:2160. doi: 10.3389/fpsyg.2019.02160 (PMC6775219; doi:10.3389/fpsyg.2019.02160)
Supplement: Supplementary file 2 [file Table_2.XLSX]

## Sheet: Sheet1
被试编号	年龄	性别	可信	吸引	定罪	信心程度	有无罪信心	惩罚强度	吸引力	像罪犯	危险度	诚实度（反向）	可信度（反向）	攻击性	事后愉悦	事后可信	犯罪外观
subject	age	gender	trustworthiness	attractiveness	conviction	confidence	transformed-confidence	pinishment magnitude	attractiveness	looked criminal	dangerous	honest(reversed-coding)	trustworthy(reversed-coding)	aggressive	pleasantness	trustworthiness	criminal appearance
1	27	2	1	1	1	7	7	4	2	4	4	3	3	3	2	5	3.4
2	22	2	1	1	1	6	6	5	3	4	3	3	3	3	3	5	3.2
3	24	2	1	1	1	6	6	4	5	3	3	5	5	5	5	3	4.2
4	23	2	1	1	0	4	-4	0	3	2	4	4	3	5	3	5	3.6
5	24	2	1	1	1	5	5	6	3	4	5	3	3	2	3	5	3.4
6	24	2	1	1	1	6	6	6	3	5	5	3	3	3	3	5	3.8
7	24	2	1	1	1	4	4	7	4	2	3	4	3	5	4	5	3.4
8	24	2	1	1	0	5	-5	0	5	4	5	5	5	3	5	3	4.4
9	25	2	1	1	1	4	4	5	3	5	6	3	3	4	3	5	4.2
10	23	2	1	1	1	6	6	5	3	4	3	4	4	4	3	4	3.8
11	24	2	1	1	1	4	4	4	1	3	4	3	4	3	1	4	3.4
12	24	2	1	1	1	6	6	6	3	5	5	3	2	3	3	6	3.6
13	25	2	1	1	1	3	3	4	3	4	3	4	4	3	3	4	3.6
14	22	2	1	1	1	5	5	4	6	2	3	6	6	3	6	2	4
15	23	2	1	1	1	5	5	6	6	2	3	2	6	3	6	2	3.2
16	22	2	1	1	1	4	4	4	5	2	3	6	6	4	5	2	4.2
17	22	2	1	1	0	7	-7	0	4	3	3	2	2	3	4	6	2.6
18	21	2	1	1	1	4	4	5	5	3	3	4	3	4	5	5	3.4
19	20	2	1	1	1	6	6	5	5	2	1	3	4	1	5	4	2.2
20	20	2	1	1	1	6	6	9	5	2	2	5	3	3	5	5	3
21	20	2	1	1	1	6	6	6	3	2	3	3	3	3	3	5	2.8
22	19	2	1	1	1	5	5	4	4	2	2	5	4	3	4	4	3.2
23	20	2	1	1	1	6	6	5	2	2	2	4	4	2	2	4	2.8
24	19	2	1	1	1	4	4	3	4	2	2	5	4	4	4	4	3.4
25	20	2	1	1	0	5	-5	0	5	3	3	4	2	3	5	6	3
26	23	2	1	1	1	7	7	6	4	2	2	4	3	2	4	5	2.6
27	20	2	1	1	1	4	4	5	3	3	2	3	3	3	3	5	2.8
28	19	2	1	1	0	5	-5	0	5	3	4	4	5	3	5	3	3.8
29	21	2	1	1	1	3	3	3	3	3	3	4	5	2	3	3	3.4
30	21	2	1	1	1	6	6	6	2	4	2	5	4	2	2	4	3.4
31	22	2	1	1	1	7	7	7	3	3	4	5	5	5	3	3	4.4
32	21	2	1	1	1	4	4	5	4	4	4	4	4	4	4	4	4
33	22	2	1	1	1	4	4	4	4	4	4	5	4	3	4	4	4
34	19	2	1	1	1	6	6	6	2	2	2	5	4	4	2	4	3.4
35	24	2	1	1	1	7	7	5	3	4	5	4	4	5	3	4	4.4
36	21	2	1	1	1	7	7	5	3	3	3	4	4	3	3	4	3.4
37	20	2	1	1	1	5	5	6	6	2	4	5	4	3	6	4	3.6
38	20	2	1	1	1	6	6	5	6	1	1	4	3	4	6	5	2.6
39	21	2	1	1	1	5	5	3	1	3	3	5	5	3	1	3	3.8
40	21	2	1	1	0	3	-3	0	4	6	5	2	2	6	4	6	4.2
41	23	2	1	1	0	2	-2	0	3	3	3	4	5	4	3	3	3.8
42	21	2	1	1	1	6	6	7	5	3	6	7	5	6	5	3	5.4
43	20	2	1	1	1	5	5	6	2	5	6	6	6	5	2	2	5.6
44	22	2	1	1	1	7	7	7	5	2	2	3	3	1	5	5	2.2
1	23	2	1	2	0	6	-6	0	4	2	2	6	5	5	4	3	4
2	21	2	1	2	0	2	-2	0	5	2	2	7	6	6	5	2	4.6
3	21	2	1	2	1	5	5	4	4	4	2	3	3	6	4	5	3.6
4	24	2	1	2	1	4	4	6	4	3	2	1	1	6	4	7	2.6
5	20	2	1	2	1	7	7	5	3	2	2	2	3	5	3	5	2.8
6	20	2	1	2	1	5	5	4	2	6	5	3	2	2	2	6	3.6
7	19	2	1	2	0	4	-4	0	2	3	4	2	2	5	2	6	3.2
8	18	2	1	2	1	6	6	4	3	6	6	2	2	3	3	6	3.8
9	18	2	1	2	1	7	7	2	1	4	6	3	3	5	1	5	4.2
10	18	2	1	2	1	5	5	6	1	6	7	1	2	7	1	6	4.6
11	19	2	1	2	1	5	5	6	3	3	4	5	4	3	3	4	3.8
12	20	2	1	2	0	3	-3	0	3	3	3	5	5	3	3	3	3.8
13	19	2	1	2	1	5	5	5	5	4	5	6	6	6	5	2	5.4
14	19	2	1	2	1	7	7	3	2	2	2	4	5	3	2	3	3.2
15	18	2	1	2	1	5	5	4	5	3	3	3	3	3	5	5	3
16	19	2	1	2	0	5	-5	0	3	4	5	5	5	5	3	3	4.8
17	18	2	1	2	1	4	4	4	2	3	3	5	5	4	2	3	4
18	19	2	1	2	1	3	3	3	2	2	4	5	3	5	2	5	3.8
19	19	2	1	2	1	7	7	6	4	3	3	4	4	4	4	4	3.6
20	20	2	1	2	1	4	4	3	4	4	4	4	4	3	4	4	3.8
21	19	2	1	2	1	5	5	4	5	3	5	3	6	4	5	2	4.2
22	19	2	1	2	1	7	7	5	1	4	4	4	4	4	1	4	4
23	19	2	1	2	1	7	7	4	4	4	4	4	4	4	4	4	4
24	18	2	1	2	0	2	-2	0	2	3	3	5	5	4	2	3	4
25	19	2	1	2	0	5	-5	0	1	7	7	7	7	7	1	1	7
26	18	2	1	2	1	5	5	6	4	3	3	4	5	5	4	3	4
27	20	2	1	2	1	7	7	5	5	1	2	3	3	2	5	5	2.2
28	20	2	1	2	1	3	3	4	4	3	3	3	3	3	4	5	3
29	18	2	1	2	1	3	3	3	2	3	4	3	4	4	2	4	3.6
30	19	2	1	2	1	2	2	2	4	4	4	4	4	4	4	4	4
31	18	2	1	2	1	7	7	5	4	3	4	4	4	7	4	4	4.4
32	18	2	1	2	1	6	6	5	2	4	3	3	4	3	2	4	3.4
33	18	2	1	2	1	6	6	4	4	4	3	4	4	4	4	4	3.8
34	19	2	1	2	0	5	-5	0	4	4	4	5	5	4	4	3	4.4
35	19	2	1	2	1	6	6	5	2	2	2	3	2	3	2	6	2.4
36	19	2	1	2	1	5	5	6	3	5	5	4	5	5	3	3	4.8
37	19	2	1	2	1	5	5	5	1	5	6	7	7	6	1	1	6.2
38	19	2	1	2	1	4	4	5	3	2	2	5	4	3	3	4	3.2
39	18	2	1	2	1	6	6	5	4	2	4	4	5	5	4	3	4
40	20	2	1	2	1	6	6	5	1	3	3	4	4	3	1	4	3.4
41	19	2	1	2	1	4	4	3	2	2	3	4	5	5	2	3	3.8
42	24	2	1	2	1	5	5	6	3	3	4	5	5	4	3	3	4.2
43	24	2	1	2	1	4	4	6	2	4	4	5	5	6	2	3	4.8
1	19	2	2	1	1	7	7	4	3	1	4	5	5	5	3	3	4
2	18	2	2	1	1	5	5	6	3	4	4	4	4	5	3	4	4.2
3	19	2	2	1	1	5	5	6	3	4	5	5	5	5	3	3	4.8
4	20	2	2	1	1	6	6	6	2	5	4	5	6	5	2	2	5
5	19	2	2	1	1	7	7	4	6	3	6	4	4	3	6	4	4
6	20	2	2	1	1	5	5	3	7	2	2	6	5	1	7	3	3.2
7	18	2	2	1	1	5	5	6	4	3	3	5	5	3	4	3	3.8
8	20	2	2	1	1	5	5	7	2	4	3	6	5	3	2	3	4.2
9	20	2	2	1	1	5	5	5	5	4	3	3	4	2	5	4	3.2
10	20	2	2	1	1	6	6	6	5	3	3	2	3	2	5	5	2.6
11	20	2	2	1	1	3	3	3	4	2	2	5	3	1	4	5	2.6
12	19	2	2	1	1	7	7	6	5	1	3	4	4	2	5	4	2.8
13	20	2	2	1	1	7	7	6	6	3	5	7	5	4	6	3	4.8
14	20	2	2	1	1	5	5	5	4	2	2	5	6	4	4	2	3.8
15	19	2	2	1	1	4	4	5	4	4	4	4	4	4	4	4	4
16	22	2	2	1	1	3	3	3	4	3	2	4	4	2	4	4	3
17	20	2	2	1	1	5	5	3	4	2	3	6	6	4	4	2	4.2
18	21	2	2	1	1	5	5	5	5	3	4	6	6	4	5	2	4.6
19	20	2	2	1	1	7	7	5	3	4	2	5	5	1	3	3	3.4
20	22	2	2	1	1	7	7	3	5	2	3	4	4	3	5	4	3.2
21	23	2	2	1	1	5	5	6	6	2	3	5	4	3	6	4	3.4
22	21	2	2	1	1	5	5	4	3	5	4	4	4	4	3	4	4.2
23	18	2	2	1	1	6	6	6	4	3	3	5	6	3	4	2	4
24	19	2	2	1	1	6	6	7	1	4	4	6	6	5	1	2	5
25	20	2	2	1	1	5	5	6	5	4	5	5	5	5	5	3	4.8
26	22	2	2	1	1	4	4	5	5	3	3	5	4	4	5	4	3.8
27	29	2	2	1	1	7	7	4	4	3	6	5	5	5	4	3	4.8
28	19	2	2	1	1	6	6	4	4	2	4	4	4	5	4	4	3.8
29	21	2	2	1	1	5	5	3	2	3	5	6	6	4	2	2	4.8
30	24	2	2	1	1	4	4	4	4	4	4	4	4	4	4	4	4
31	20	2	2	1	1	5	5	4	4	3	5	6	7	6	4	1	5.4
32	19	2	2	1	0	3	-3	0	4	4	4	1	5	4	4	3	3.6
33	23	2	2	1	1	4	4	4	5	2	2	4	4	4	5	4	3.2
34	23	2	2	1	1	7	7	4	3	1	2	4	3	2	3	5	2.4
35	19	2	2	1	1	6	6	6	5	3	5	7	7	1	5	1	4.6
36	20	2	2	1	1	5	5	4	1	7	7	7	7	3	1	1	6.2
37	23	2	2	1	1	5	5	5	5	3	3	2	3	2	5	5	2.6
38	22	2	2	1	1	4	4	5	3	5	5	4	4	4	3	4	4.4
39	19	2	2	1	1	6	6	5	6	6	6	6	6	4	6	2	5.6
40	21	2	2	1	1	5	5	7	2	3	4	6	6	4	2	2	4.6
41	25	2	2	1	1	4	4	6	4	4	6	4	5	5	4	3	4.8
1	20	2	2	2	0	3	-3	0	3	3	4	5	5	5	3	3	4.4
2	21	2	2	2	0	6	-6	0	1	5	5	2	6	6	1	2	4.8
3	22	2	2	2	1	6	6	7	3	5	5	5	5	5	3	3	5
4	24	2	2	2	1	5	5	5	2	3	5	6	6	4	2	2	4.8
5	23	2	2	2	0	4	-4	0	6	4	5	5	5	5	6	3	4.8
6	26	2	2	2	1	6	6	7	2	5	4	5	5	5	2	3	4.8
7	25	2	2	2	1	6	6	3	1	6	6	6	6	5	1	2	5.8
8	21	2	2	2	1	5	5	6	3	4	4	5	5	4	3	3	4.4
9	24	2	2	2	0	5	-5	0	2	4	4	3	3	4	2	5	3.6
10	19	2	2	2	1	7	7	5	1	6	6	7	6	6	1	2	6.2
11	20	2	2	2	1	7	7	3	1	5	4	6	6	2	1	2	4.6
12	18	2	2	2	1	6	6	6	1	4	5	4	4	6	1	4	4.6
13	19	2	2	2	1	6	6	6	1	7	6	6	6	6	1	2	6.2
14	19	2	2	2	1	6	6	5	1	4	5	4	4	3	1	4	4
15	20	2	2	2	1	7	7	6	3	3	3	3	4	5	3	4	3.6
16	20	2	2	2	1	7	7	6	1	4	4	5	5	3	1	3	4.2
17	20	2	2	2	1	7	7	3	1	7	7	7	7	7	1	1	7
18	19	2	2	2	1	6	6	6	2	5	7	6	6	6	2	2	6
19	19	2	2	2	1	7	7	3	1	5	4	6	6	3	1	2	4.8
20	19	2	2	2	1	4	4	5	2	1	4	4	4	2	2	4	3
21	18	2	2	2	1	6	6	5	3	4	4	5	5	4	3	3	4.4
22	18	2	2	2	1	5	5	6	1	4	5	6	6	6	1	2	5.4
23	19	2	2	2	0	4	-4	0	3	4	4	3	5	2	3	3	3.6
24	18	2	2	2	1	5	5	7	1	4	4	3	6	5	1	2	4.4
25	20	2	2	2	1	5	5	7	4	5	5	5	4	5	4	4	4.8
26	20	2	2	2	1	6	6	5	2	3	3	5	5	2	2	3	3.6
27	19	2	2	2	1	5	5	7	2	4	3	5	5	4	2	3	4.2
28	19	2	2	2	1	4	4	7	3	4	4	4	5	3	3	3	4
29	19	2	2	2	0	4	-4	0	2	3	4	4	6	5	2	2	4.4
30	19	2	2	2	1	5	5	3	1	4	3	5	5	3	1	3	4
31	18	2	2	2	0	6	-6	0	2	4	6	4	6	5	2	2	5
32	19	2	2	2	1	2	2	3	1	3	4	7	7	4	1	1	5
33	19	2	2	2	0	5	-5	0	4	5	4	4	4	4	4	4	4.2
34	19	2	2	2	1	5	5	6	2	4	5	3	4	5	2	4	4.2
35	20	2	2	2	1	4	4	5	1	7	6	5	6	6	1	2	6
36	19	2	2	2	0	2	-2	0	3	4	4	5	5	4	3	3	4.4
37	18	2	2	2	1	5	5	3	1	3	4	5	5	3	1	3	4
38	20	2	2	2	1	5	5	6	1	7	6	6	6	5	1	2	6
39	18	2	2	2	0	5	-5	0	2	4	4	4	5	4	2	3	4.2
40	19	2	2	2	0	5	-5	0	3	2	3	4	4	5	3	4	3.6
41	19	2	2	2	1	4	4	8	1	5	5	6	5	5	1	3	5.2
42	19	2	2	2	1	5	5	5	3	5	5	4	4	4	3	4	4.4
43	20	2	2	2	1	6	6	6	1	4	4	4	4	4	1	4	4
44	19	2	2	2	1	5	5	5	2	3	4	5	5	4	2	3	4.2
1	18	1	1	1	0	5	-5	0	5	3	4	4	5	5	5	3	4.2
2	19	1	1	1	1	4	4	7	4	4	5	4	4	4	4	4	4.2
3	19	1	1	1	1	6	6	7	6	1	2	5	3	4	6	5	3
4	20	1	1	1	1	7	7	5	6	2	2	3	2	3	6	6	2.4
5	19	1	1	1	1	4	4	4	5	2	2	4	4	2	5	4	2.8
6	18	1	1	1	1	5	5	8	3	4	4	5	5	4	3	3	4.4
7	24	1	1	1	1	7	7	4	3	5	5	5	5	5	3	3	5
8	24	1	1	1	1	7	7	6	4	4	4	3	3	4	4	5	3.6
9	18	1	1	1	1	6	6	4	3	5	4	5	5	5	3	3	4.8
10	19	1	1	1	1	7	7	2	5	4	5	6	6	5	5	2	5.2
11	20	1	1	1	1	5	5	5	4	5	5	5	5	5	4	3	5
12	19	1	1	1	1	7	7	7	4	5	5	4	4	5	4	4	4.6
13	20	1	1	1	1	5	5	6	3	4	4	3	5	5	3	3	4.2
14	19	1	1	1	0	4	-4	0	5	2	2	3	3	1	5	5	2.2
15	19	1	1	1	1	7	7	6	3	4	3	5	4	3	3	4	3.8
16	21	1	1	1	0	2	-2	0	5	5	6	4	5	6	5	3	5.2
17	18	1	1	1	1	6	6	7	4	4	5	3	3	6	4	5	4.2
18	18	1	1	1	0	4	-4	0	3	5	5	3	3	5	3	5	4.2
19	23	1	1	1	1	5	5	5	4	3	3	3	4	3	4	4	3.2
20	23	1	1	1	0	6	-6	0	5	4	5	7	5	3	5	3	4.8
21	22	1	1	1	1	3	3	2	4	2	3	4	5	2	4	3	3.2
22	24	1	1	1	0	3	-3	0	6	2	2	3	3	2	6	5	2.4
23	24	1	1	1	1	2	2	4	5	6	5	5	5	5	5	3	5.2
24	23	1	1	1	1	5	5	5	4	4	4	4	4	4	4	4	4
25	19	1	1	1	0	7	-7	0	5	2	2	4	4	2	5	4	2.8
26	19	1	1	1	1	6	6	5	4	3	3	4	4	4	4	4	3.6
27	23	1	1	1	0	3	-3	0	4	3	5	5	5	4	4	3	4.4
28	20	1	1	1	1	6	6	3	3	1	1	3	3	2	3	5	2
29	22	1	1	1	1	6	6	3	4	2	2	4	3	3	4	5	2.8
30	25	1	1	1	1	5	5	6	5	3	3	4	4	4	5	4	3.6
31	19	1	1	1	1	7	7	2	4	4	4	4	4	4	4	4	4
32	21	1	1	1	1	7	7	4	3	3	3	6	3	4	3	5	3.8
33	21	1	1	1	1	3	3	4	5	3	2	5	5	2	5	3	3.4
34	18	1	1	1	1	6	6	4	5	4	2	5	4	2	5	4	3.4
1	20	1	1	2	1	4	4	3	5	2	2	5	5	2	5	3	3.2
2	22	1	1	2	1	6	6	7	5	2	1	3	3	7	5	5	3.2
3	20	1	1	2	0	4	-4	0	4	1	1	4	4	6	4	4	3.2
4	20	1	1	2	1	7	7	5	3	7	3	4	3	4	3	5	4.2
5	19	1	1	2	1	6	6	3	5	3	2	4	4	5	5	4	3.6
6	20	1	1	2	1	5	5	4	5	1	3	5	5	7	5	3	4.2
7	20	1	1	2	1	6	6	3	2	3	5	5	5	5	2	3	4.6
8	21	1	1	2	1	7	7	4	2	5	4	2	2	4	2	6	3.4
9	21	1	1	2	1	6	6	4	5	1	1	6	6	2	5	2	3.2
10	23	1	1	2	1	7	7	3	3	4	3	4	3	3	3	5	3.4
11	21	1	1	2	1	6	6	7	2	3	5	3	3	5	2	5	3.8
12	22	1	1	2	1	7	7	5	3	4	4	4	4	4	3	4	4
13	21	1	1	2	0	5	-5	0	3	4	4	3	2	2	3	6	3
14	25	1	1	2	1	7	7	6	3	7	5	3	2	5	3	6	4.4
15	21	1	1	2	1	6	6	7	4	3	3	3	3	3	4	5	3
16	22	1	1	2	1	4	4	4	2	6	6	3	4	5	2	4	4.8
17	21	1	1	2	0	4	-4	0	3	4	4	5	5	5	3	3	4.6
18	22	1	1	2	0	6	-6	0	3	4	4	4	4	4	3	4	4
19	19	1	1	2	1	7	7	6	5	2	1	3	2	4	5	6	2.4
20	20	1	1	2	0	5	-5	0	3	2	2	3	3	2	3	5	2.4
21	19	1	1	2	1	5	5	6	4	3	3	6	6	4	4	2	4.4
22	26	1	1	2	1	6	6	3	2	5	5	6	6	5	2	2	5.4
23	24	1	1	2	0	5	-5	0	5	1	4	4	3	4	5	5	3.2
24	19	1	1	2	0	7	-7	0	3	3	3	3	3	5	3	5	3.4
25	20	1	1	2	1	6	6	5	3	5	5	5	6	5	3	2	5.2
26	24	1	1	2	1	7	7	7	6	4	3	6	6	4	6	2	4.6
27	24	1	1	2	0	5	-5	0	5	3	3	3	4	2	5	4	3
28	24	1	1	2	1	6	6	6	5	5	5	6	6	5	5	2	5.4
29	19	1	1	2	1	5	5	4	4	3	3	3	4	3	4	4	3.2
30	20	1	1	2	0	6	-6	0	3	3	3	2	3	2	3	5	2.6
31	20	1	1	2	1	7	7	6	4	5	3	4	4	5	4	4	4.2
32	19	1	1	2	1	7	7	3	3	3	1	3	3	2	3	5	2.4
33	19	1	1	2	1	6	6	5	4	2	4	3	4	5	4	4	3.6
34	19	1	1	2	1	5	5	7	6	3	3	5	4	5	6	4	4
1	19	1	2	1	1	5	5	6	5	2	4	5	4	2	5	4	3.4
2	20	1	2	1	1	6	6	7	1	4	6	6	4	4	1	4	4.8
3	19	1	2	1	1	7	7	5	5	4	5	5	5	5	5	3	4.8
4	20	1	2	1	1	1	1	2	3	3	5	5	5	6	3	3	4.8
5	19	1	2	1	1	6	6	4	3	5	4	5	5	5	3	3	4.8
6	19	1	2	1	0	5	-5	0	5	4	4	5	4	5	5	4	4.4
7	19	1	2	1	1	7	7	6	4	2	7	4	4	3	4	4	4
8	19	1	2	1	1	3	3	3	5	2	2	5	5	3	5	3	3.4
9	20	1	2	1	1	6	6	6	4	2	1	6	5	1	4	3	3
10	20	1	2	1	0	4	-4	0	4	4	4	4	5	3	4	3	4
11	20	1	2	1	1	5	5	6	3	3	7	3	4	5	3	4	4.4
12	19	1	2	1	1	5	5	5	4	4	5	4	4	4	4	4	4.2
13	18	1	2	1	1	5	5	3	3	4	3	5	5	3	3	3	4
14	20	1	2	1	1	5	5	5	3	2	4	3	5	4	3	3	3.6
15	20	1	2	1	0	4	-4	0	4	2	2	5	5	3	4	3	3.4
16	20	1	2	1	1	6	6	5	4	3	2	4	4	4	4	4	3.4
17	20	1	2	1	1	7	7	5	3	4	4	5	5	3	3	3	4.2
18	19	1	2	1	1	5	5	3	5	2	2	7	6	3	5	2	4
19	20	1	2	1	0	5	-5	0	4	3	4	4	4	3	4	4	3.6
20	19	1	2	1	1	5	5	4	4	3	4	6	6	1	4	2	4
21	19	1	2	1	1	6	6	6	7	2	2	5	5	3	7	3	3.4
22	19	1	2	1	1	4	4	5	1	2	2	4	4	4	1	4	3.2
23	19	1	2	1	0	5	-5	0	1	4	6	6	6	6	1	2	5.6
24	19	1	2	1	1	7	7	6	4	1	3	5	5	3	4	3	3.4
25	20	1	2	1	1	5	5	5	1	4	4	4	4	4	1	4	4
26	20	1	2	1	1	6	6	6	2	5	4	6	3	6	2	5	4.8
27	18	1	2	1	0	5	-5	0	2	3	3	5	5	1	2	3	3.4
28	19	1	2	1	0	6	-6	0	4	5	4	6	6	3	4	2	4.8
29	19	1	2	1	1	6	6	5	3	3	2	4	5	3	3	3	3.4
30	18	1	2	1	1	6	6	5	2	6	6	6	6	5	2	2	5.8
31	19	1	2	1	1	6	6	6	3	5	4	5	4	3	3	4	4.2
32	18	1	2	1	1	5	5	5	4	3	3	3	3	3	4	5	3
33	21	1	2	1	1	3	3	3	7	4	4	4	4	4	7	4	4
34	20	1	2	1	0	1	-1	0	5	5	6	3	5	5	5	3	4.8
35	20	1	2	1	1	6	6	7	4	4	4	5	5	4	4	3	4.4
36	24	1	2	1	0	7	-7	0	4	2	5	4	3	3	4	5	3.4
1	24	1	2	2	1	7	7	4	1	6	5	6	6	6	1	2	5.8
2	20	1	2	2	1	6	6	6	1	5	5	5	5	5	1	3	5
3	18	1	2	2	1	6	6	3	4	3	3	5	5	3	4	3	3.8
4	19	1	2	2	1	5	5	5	1	4	4	6	6	4	1	2	4.8
5	21	1	2	2	1	4	4	3	2	5	5	4	6	4	2	2	4.8
6	20	1	2	2	0	3	-3	0	1	3	3	5	5	4	1	3	4
7	20	1	2	2	1	6	6	6	2	5	5	6	6	4	2	2	5.2
8	18	1	2	2	1	6	6	6	2	5	5	5	5	5	2	3	5
9	18	1	2	2	1	6	6	6	2	5	5	6	6	5	2	2	5.4
10	18	1	2	2	1	7	7	4	1	6	5	6	5	4	1	3	5.2
11	19	1	2	2	0	5	-5	0	3	3	4	4	4	4	3	4	3.8
12	22	1	2	2	1	7	7	5	1	7	4	5	5	7	1	3	5.6
13	20	1	2	2	1	4	4	3	1	2	2	5	6	2	1	2	3.4
14	19	1	2	2	0	6	-6	0	3	4	4	4	4	4	3	4	4
15	20	1	2	2	1	5	5	6	2	4	3	5	5	4	2	3	4.2
16	19	1	2	2	0	4	-4	0	2	3	4	2	5	5	2	3	3.8
17	18	1	2	2	1	7	7	5	3	4	4	5	5	1	3	3	3.8
18	20	1	2	2	1	7	7	6	1	7	6	7	7	5	1	1	6.4
19	19	1	2	2	1	5	5	4	2	5	5	5	5	6	2	3	5.2
20	19	1	2	2	1	7	7	6	1	5	5	6	6	4	1	2	5.2
21	18	1	2	2	1	6	6	6	1	7	7	5	5	5	1	3	5.8
22	18	1	2	2	1	7	7	4	1	4	4	4	5	3	1	3	4
23	18	1	2	2	1	6	6	6	1	7	6	7	7	6	1	1	6.6
24	18	1	2	2	1	7	7	4	1	3	3	6	5	3	1	3	4
25	18	1	2	2	1	5	5	3	3	3	5	4	5	6	3	3	4.6
26	19	1	2	2	1	5	5	5	4	3	3	4	4	3	4	4	3.4
27	19	1	2	2	1	7	7	4	1	6	7	7	7	7	1	1	6.8
28	19	1	2	2	1	4	4	4	2	6	5	6	6	5	2	2	5.6
29	20	1	2	2	1	6	6	5	2	4	5	4	5	4	2	3	4.4
30	21	1	2	2	1	4	4	5	4	4	4	4	4	4	4	4	4
31	19	1	2	2	1	6	6	5	3	6	4	6	6	4	3	2	5.2
32	20	1	2	2	0	7	-7	0	4	4	5	4	4	4	4	4	4.2
33	20	1	2	2	1	6	6	4	4	5	4	3	3	4	4	5	3.8
34	18	1	2	2	1	4	4	5	1	5	4	6	6	6	1	2	5.4
35	19	1	2	2	1	7	7	5	4	3	3	4	4	5	4	4	3.8
