# Supplementary material for: Effects of Male Defendants’ Attractiveness and Trustworthiness on Simulated Judicial Decisions in Two Different Swindles
Source: Front Psychol. 2019 Sep 26;10:2160. doi: 10.3389/fpsyg.2019.02160 (PMC6775219; doi:10.3389/fpsyg.2019.02160)
Supplement: Supplementary file 3 [file Table_3.XLSX]

## Sheet: Sheet1
被试编号	年龄	性别	可信	吸引	定罪	信心程度	有无罪信心	惩罚强度	实际量刑	吸引力	像罪犯	危险度	诚实度（反向）	可信度（反向）	攻击性	厌恶度	事后吸引	事后可信	犯罪外观	犯罪外观分组
subject	age	gender	trustworthiness	attractiveness	conviction	confidence	transformed-confidence	pinishment magnitude	sentencing decisions	attractiveness	looked criminal	dangerous	honest(reversed-coding)	trustworthy(reversed-coding)	aggressive	disgust emotion	attractiveness	trustworthiness	criminal appearance	group
1	18	2	1	1	0	4	-4	0	0	4	4	4	4	5	4	3	4	3	4.2	2
2	18	2	1	1	1	4	4	6	6	4	4	6	5	5	5	4	4	3	5	2
3	18	2	1	1	1	6	6	8	3	4	4	5	6	6	5	3	4	2	5.2	2
4	19	2	1	1	0	2	-2	0	0	2	4	3	7	3	2	2	2	5	3.8	1
5	18	2	1	1	1	5	5	7	0.5	3	3	4	6	5	5	2	3	3	4.6	2
6	18	2	1	1	0	4	-4	0	0	3	3	4	3	5	3	4	3	3	3.6	1
7	19	2	1	1	0	4	-4	0	0	4	4	5	5	5	4	3	4	3	4.6	2
8	19	2	1	1	1	5	5	3	0	3	3	3	6	6	5	4	3	2	4.6	2
9	18	2	1	1	1	6	6	5	0.5	2	2	4	4	4	3	2	2	4	3.4	1
10	18	2	1	1	1	4	4	4	2	3	1	1	4	3	4	5	3	5	2.6	1
11	19	2	1	1	1	5	5	5	0.5	5	3	3	3	5	4	3	5	3	3.6	1
12	18	2	1	1	1	5	5	7	3	3	4	6	5	6	4	5	3	2	5	2
13	19	2	1	1	1	1	1	4	0.5	2	4	3	4	4	3	4	2	4	3.6	1
14	20	2	1	1	1	5	5	6	2	3	3	4	4	3	5	3	3	5	3.8	1
15	20	2	1	1	1	6	6	8	1	5	5	4	5	4	3	3	5	4	4.2	2
16	19	2	1	1	1	7	7	7	0.5	5	3	6	4	5	3	6	5	3	4.2	2
17	19	2	1	1	1	5	5	5	3	5	3	3	4	4	3	2	5	4	3.4	1
18	19	2	1	1	1	4	4	4	0.5	5	4	3	4	4	4	2	5	4	3.8	1
19	18	2	1	1	0	6	-6	0	0	5	3	3	3	3	4	1	5	5	3.2	1
20	20	2	1	1	0	5	-5	0	0	4	1	2	2	3	4	1	4	5	2.4	1
21	20	2	1	1	1	4	4	5	0.5	5	3	4	3	4	3	2	5	4	3.4	1
22	18	2	1	1	1	3	3	2	0.5	3	2	4	3	4	3	3	3	4	3.2	1
23	18	2	1	1	0	4	-4	0	0	4	4	5	4	4	4	4	4	4	4.2	2
24	20	2	1	1	1	6	6	4	0.5	5	4	4	4	4	4	4	5	4	4	1
25	18	2	1	1	1	5	5	3	2	2	5	5	4	5	4	4	2	3	4.6	2
26	19	2	1	1	1	4	4	7	1	2	2	3	5	5	3	4	2	3	3.6	1
27	20	2	1	1	1	5	5	5	1	6	2	3	4	5	5	3	6	3	3.8	1
28	19	2	1	1	1	6	6	6	0.5	4	3	3	4	5	4	4	4	3	3.8	1
29	19	2	1	1	0	5	-5	0	0	5	4	4	4	4	4	2	5	4	4	2
30	18	2	1	1	1	4	4	3	0	3	1	4	4	4	6	4	3	4	3.8	1
31	19	2	1	1	1	5	5	4	0.5	5	4	4	3	4	4	3	5	4	3.8	1
32	18	2	1	1	1	6	6	6	2	6	1	2	2	4	2	1	6	4	2.2	1
33	21	2	1	1	1	5	5	5	0	3	4	4	3	5	3	3	3	3	3.8	1
34	21	2	1	1	1	5	5	4	0	2	4	4	5	4	5	3	2	4	4.4	2
35	18	2	1	1	1	5	5	6	0	5	2	3	3	3	3	2	5	5	2.8	1
36	19	2	1	1	1	5	5	5	2	4	3	3	4	5	2	2	4	3	3.4	1
37	18	2	1	1	1	4	4	3	1	4	1	2	4	5	4	1	4	3	3.2	1
38	18	2	1	1	1	7	7	6	3	3	3	4	2	3	3	3	3	5	3	1
39	20	2	1	1	0	5	-5	0	0	3	4	3	3	3	2	2	3	5	3	1
40	20	2	1	1	0	7	-7	0	0	5	4	4	4	4	4	4	5	4	4	1
41	20	2	1	1	0	6	-6	0	0	3	4	4	4	5	4	3	3	3	4.2	2
42	19	2	1	1	0	6	-6	0	0	4	2	3	2	3	2	2	4	5	2.4	1
43	18	2	1	1	1	4	4	4	0.5	3	3	3	5	6	3	4	3	2	4	2
44	19	2	1	1	1	6	6	7	0.5	4	4	2	4	4	2	2	4	4	3.2	1
45	18	2	1	1	1	5	5	5	0.5	5	1	5	4	3	5	1	5	5	3.6	1
46	20	2	1	1	0	5	-5	0	0	6	2	4	5	3	3	3	6	5	3.4	1
47	19	2	1	1	0	6	-6	0	0	3	3	3	4	4	3	4	3	4	3.4	1
48	19	2	1	1	0	5	-5	0	0	4	3	3	3	4	4	4	4	4	3.4	1
1	18	2	1	2	1	5	5	6	0.5	1	3	2	5	5	2	3	1	3	3.4	1
2	19	2	1	2	0	4	-4	0	0	2	2	5	4	4	5	3	2	4	4	1
3	21	2	1	2	1	4	4	5	0.5	3	3	4	5	4	4	2	3	4	4	2
4	19	2	1	2	0	6	-6	0	0	4	4	4	5	5	4	4	4	3	4.4	2
5	19	2	1	2	1	7	7	7	7	1	5	4	4	4	5	5	1	4	4.4	2
6	19	2	1	2	0	6	-6	0	0	2	4	4	5	4	4	4	2	4	4.2	2
7	18	2	1	2	1	5	5	4	1	3	1	2	4	4	4	4	3	4	3	1
8	19	2	1	2	0	5	-5	0	0	2	3	4	4	4	5	4	2	4	4	1
9	19	2	1	2	1	4	4	5	2	3	3	3	3	4	4	2	3	4	3.4	1
10	23	2	1	2	1	3	3	3	0.5	2	3	4	4	4	3	2	2	4	3.6	1
11	19	2	1	2	1	5	5	6	4	1	4	4	4	5	5	5	1	3	4.4	2
12	21	2	1	2	1	5	5	3	0	3	3	3	3	4	4	3	3	4	3.4	1
13	18	2	1	2	1	4	4	7	2	1	2	3	5	5	4	3	1	3	3.8	1
14	18	2	1	2	1	3	3	3	0.5	2	4	3	4	4	3	2	2	4	3.6	1
15	20	2	1	2	1	4	4	5	0	3	2	2	3	5	3	4	3	3	3	1
16	19	2	1	2	1	5	5	5	1.5	3	3	4	3	5	4	2	3	3	3.8	1
17	20	2	1	2	1	5	5	5	2	1	3	6	4	5	6	6	1	3	4.8	2
18	20	2	1	2	1	3	3	4	1.5	2	4	4	5	5	4	5	2	3	4.4	2
19	19	2	1	2	1	6	6	3	0	1	1	1	5	5	3	3	1	3	3	1
20	21	2	1	2	1	5	5	8	10	4	3	3	5	5	4	3	4	3	4	2
21	18	2	1	2	1	6	6	4	0.5	1	3	3	6	6	4	5	1	2	4.4	2
22	20	2	1	2	1	6	6	4	0.5	1	6	6	5	5	5	7	1	3	5.4	2
23	18	2	1	2	1	6	6	5	2	1	3	4	3	4	4	5	1	4	3.6	1
24	18	2	1	2	0	6	-6	0	0	1	4	6	6	6	5	4	1	2	5.4	2
25	18	2	1	2	0	3	-3	0	0	1	4	5	5	5	3	2	1	3	4.4	2
26	19	2	1	2	1	6	6	8	3	1	5	5	6	6	6	5	1	2	5.6	2
27	20	2	1	2	0	4	-4	0	0	2	4	3	4	4	4	2	2	4	3.8	1
28	19	2	1	2	1	6	6	6	0.5	3	3	3	5	5	3	3	3	3	3.8	1
29	18	2	1	2	0	5	-5	0	0	2	3	3	5	4	3	4	2	4	3.6	1
30	20	2	1	2	0	5	-5	0	0	2	3	2	6	4	3	2	2	4	3.6	1
31	22	2	1	2	1	4	4	4	1.5	3	4	4	3	4	4	5	3	4	3.8	1
32	19	2	1	2	0	3	-3	0	0	1	1	2	4	4	4	4	1	4	3	1
33	21	2	1	2	0	4	-4	0	0	1	5	5	3	4	5	6	1	4	4.4	2
34	24	2	1	2	0	6	-6	0	0	2	4	4	4	5	4	3	2	3	4.2	2
35	21	2	1	2	1	4	4	3	1	1	4	4	6	6	4	5	1	2	4.8	2
36	20	2	1	2	0	5	-5	0	0	1	3	3	3	3	2	4	1	5	2.8	1
37	20	2	1	2	0	3	-3	0	0	1	3	3	6	5	4	2	1	3	4.2	2
38	22	2	1	2	0	4	-4	0	0	4	3	2	6	5	1	3	4	3	3.4	1
39	21	2	1	2	1	7	7	5	0.5	2	4	4	5	6	4	3	2	2	4.6	2
40	23	2	1	2	0	4	-4	0	0	3	4	4	5	5	5	4	3	3	4.6	2
41	27	2	1	2	1	3	3	4	2	2	5	5	5	6	5	6	2	2	5.2	2
42	27	2	1	2	1	5	5	5	1	4	2	3	3	5	3	4	4	3	3.2	1
43	25	2	1	2	1	7	7	5	0.5	2	4	3	6	6	2	4	2	2	4.2	2
44	23	2	1	2	0	4	-4	0	0	1	4	4	4	4	4	4	1	4	4	1
45	24	2	1	2	1	6	6	5	0	1	2	2	5	5	3	2	1	3	3.4	1
46	18	2	1	2	1	4	4	4	0.5	2	1	1	3	3	2	1	2	5	2	1
47	19	2	1	2	1	5	5	2	0	1	2	4	4	4	5	3	1	4	3.8	1
1	20	2	2	1	0	4	-4	0	0	4	3	3	3	3	3	3	4	5	3	1
2	19	2	2	1	1	5	5	5	0	5	3	2	5	5	5	4	5	3	4	2
3	19	2	2	1	1	5	5	4	1	4	4	3	6	5	4	3	4	3	4.4	2
4	20	2	2	1	1	5	5	6	0	5	4	5	5	5	4	4	5	3	4.6	2
5	19	2	2	1	1	5	5	5	0.5	4	4	5	5	5	4	3	4	3	4.6	2
6	19	2	2	1	0	3	-3	0	0	2	2	2	2	3	3	2	2	5	2.4	1
7	19	2	2	1	1	4	4	5	0.5	5	4	3	4	4	4	3	5	4	3.8	1
8	18	2	2	1	0	5	-5	0	0	4	3	4	4	4	5	4	4	4	4	1
9	19	2	2	1	1	6	6	5	2	3	5	7	3	6	5	6	3	2	5.2	2
10	19	2	2	1	1	6	6	3	0	5	4	6	4	4	5	3	5	4	4.6	2
11	20	2	2	1	1	6	6	6	0	3	4	5	5	5	4	4	3	3	4.6	2
12	18	2	2	1	0	4	-4	0	0	3	4	4	4	5	3	3	3	3	4	2
13	18	2	2	1	1	4	4	5	0	4	2	2	3	3	3	3	4	5	2.6	1
14	20	2	2	1	1	6	6	5	0.5	6	2	4	7	4	4	5	6	4	4.2	2
15	19	2	2	1	0	5	-5	0	0	6	4	5	5	5	4	2	6	3	4.6	2
16	18	2	2	1	0	5	-5	0	0	3	4	5	4	5	5	3	3	3	4.6	2
17	18	2	2	1	1	5	5	3	0.5	3	5	5	6	6	7	6	3	2	5.8	2
18	22	2	2	1	0	5	-5	0	0	4	4	5	5	5	3	4	4	3	4.4	2
19	18	2	2	1	1	5	5	4	1	2	3	3	3	5	4	2	2	3	3.6	1
20	20	2	2	1	1	4	4	6	1	4	2	3	5	4	3	3	4	4	3.4	1
21	18	2	2	1	1	7	7	6	3	3	3	5	5	5	5	6	3	3	4.6	2
22	24	2	2	1	1	5	5	4	1	7	2	2	6	4	3	1	7	4	3.4	1
23	19	2	2	1	1	4	4	4	0	6	2	5	5	5	3	3	6	3	4	1
24	22	2	2	1	1	6	6	5	0	6	2	4	5	5	3	1	6	3	3.8	1
25	18	2	2	1	1	7	7	5	0	5	4	5	4	4	4	1	5	4	4.2	2
26	18	2	2	1	0	3	-3	0	0	5	5	5	5	5	5	3	5	3	5	2
27	21	2	2	1	0	4	-4	0	0	5	2	3	6	4	5	3	5	4	4	2
28	20	2	2	1	1	5	5	6	1	4	4	4	5	5	4	5	4	3	4.4	2
29	20	2	2	1	1	4	4	4	4.5	3	5	6	6	5	6	6	3	3	5.6	2
30	19	2	2	1	0	3	-3	0	0	4	1	3	5	3	1	1	4	5	2.6	1
31	19	2	2	1	1	4	4	4	2	4	2	4	3	3	5	4	4	3	3.4	1
32	19	2	2	1	0	4	-4	0	0	5	3	4	3	5	3	2	5	5	3.6	1
33	19	2	2	1	1	4	4	5	2	5	2	2	4	4	4	4	5	4	3.2	1
34	20	2	2	1	0	5	-5	0	0	5	4	5	3	3	5	4	5	3	4	1
35	21	2	2	1	0	4	-4	0	0	3	4	5	3	3	3	3	3	3	3.6	1
36	21	2	2	1	0	4	-4	0	0	5	5	5	3	4	4	3	5	4	4.2	2
37	20	2	2	1	1	3	3	3	1	5	2	2	4	4	3	2	5	4	3	1
38	19	2	2	1	1	3	3	5	0.5	3	4	4	3	3	3	5	3	3	3.4	1
39	20	2	2	1	1	6	6	7	2	5	5	5	3	3	5	4	5	3	4.2	2
40	19	2	2	1	1	7	7	5	4.5	4	1	2	2	2	3	2	4	2	2	1
41	18	2	2	1	1	7	7	6	7	4	2	2	2	2	2	3	4	2	2	1
42	19	2	2	1	1	6	6	5	0	5	6	6	3	3	6	4	5	3	4.8	2
43	19	2	2	1	1	4	4	4	4.5	5	3	3	3	3	5	3	5	3	3.4	1
44	19	2	2	1	0	6	-6	0	0	3	2	2	4	4	4	2	3	4	3.2	1
45	20	2	2	1	0	4	-4	0	0	5	2	4	3	4	4	3	5	4	3.4	1
46	20	2	2	1	1	7	7	5	0.5	4	4	4	4	4	4	4	4	4	4	2
47	20	2	2	1	1	5	5	7	1	5	4	4	4	2	3	1	5	2	3.4	1
48	19	2	2	1	1	2	2	4	0	4	2	4	3	2	3	2	4	2	2.8	1
1	21	2	2	2	0	5	-5	0	0	1	5	5	4	4	6	7	1	4	4.8	2
2	20	2	2	2	1	7	7	6	4.5	1	4	5	3	7	5	7	1	1	4.8	2
3	19	2	2	2	0	4	-4	0	0	1	5	4	5	5	3	5	1	3	4.4	2
4	19	2	2	2	1	2	2	4	1	1	3	3	5	5	5	2	1	3	4.2	2
5	23	2	2	2	1	7	7	6	0.5	1	5	3	4	5	3	2	1	3	4	1
6	26	2	2	2	1	4	4	4	1	1	5	6	5	5	6	6	1	3	5.4	2
7	23	2	2	2	1	4	4	5	7	1	7	6	6	7	7	7	1	1	6.6	2
8	18	2	2	2	1	7	7	6	3	1	6	6	7	6	5	6	1	2	6	2
9	23	2	2	2	1	4	4	2	0	3	3	5	4	4	5	4	3	4	4.2	2
10	19	2	2	2	1	4	4	4	0.5	3	4	4	4	4	5	4	3	4	4.2	2
11	22	2	2	2	1	4	4	6	2	1	5	5	4	4	4	5	1	4	4.4	2
12	23	2	2	2	1	4	4	3	0.5	1	6	5	6	6	6	6	1	2	5.8	2
13	22	2	2	2	0	4	-4	0	0	1	4	4	4	5	5	4	1	3	4.4	2
14	25	2	2	2	0	5	-5	0	0	1	5	5	3	3	6	7	1	5	4.4	2
15	19	2	2	2	1	6	6	4	0.5	2	5	5	3	6	5	5	2	2	4.8	2
16	18	2	2	2	1	5	5	6	2	1	6	6	6	6	4	7	1	2	5.6	2
17	20	2	2	2	1	5	5	6	3	1	3	3	5	5	4	5	1	3	4	2
18	19	2	2	2	1	6	6	6	3	2	3	5	4	5	6	5	2	3	4.6	2
19	19	2	2	2	0	4	-4	0	0	3	6	5	4	5	4	5	3	3	4.8	2
20	18	2	2	2	1	6	6	6	1.5	2	5	5	4	4	5	5	2	4	4.6	2
21	19	2	2	2	1	4	4	4	2	1	4	5	5	5	5	5	1	3	4.8	2
22	18	2	2	2	1	6	6	4	0	3	5	5	5	5	4	4	3	3	4.8	2
23	19	2	2	2	1	7	7	5	0.5	1	3	3	3	4	7	4	1	4	4	1
24	19	2	2	2	1	4	4	6	0.5	1	3	5	6	6	4	6	1	2	4.8	2
25	19	2	2	2	1	4	4	4	3	1	5	4	5	5	4	6	1	3	4.6	2
26	19	2	2	2	1	5	5	4	1	1	6	6	7	7	7	7	1	1	6.6	2
27	19	2	2	2	1	5	5	3	0.5	2	5	5	6	6	5	4	2	2	5.4	2
28	18	2	2	2	0	5	-5	0	0	1	6	5	6	5	4	5	1	3	5.2	2
29	20	2	2	2	1	4	4	4	0.5	2	3	4	4	5	4	2	2	3	4	2
30	20	2	2	2	0	3	-3	0	0	1	5	5	5	5	4	5	1	3	4.8	2
31	19	2	2	2	1	4	4	4	0	2	3	3	3	4	4	4	2	4	3.4	1
32	18	2	2	2	1	5	5	7	2	1	4	4	4	5	4	5	1	3	4.2	2
33	18	2	2	2	1	4	4	7	1.5	1	6	7	5	6	5	6	1	2	5.8	2
34	19	2	2	2	1	6	6	6	0.5	1	5	5	5	5	5	6	1	3	5	2
35	20	2	2	2	1	6	6	6	0.5	1	7	7	1	7	7	7	1	1	5.8	2
36	19	2	2	2	0	4	-4	0	0	1	5	5	3	5	3	4	1	3	4.2	2
37	18	2	2	2	1	5	5	1	0	2	3	2	5	6	5	2	2	2	4.2	2
38	19	2	2	2	0	4	-4	0	0	1	5	7	3	3	6	4	1	3	4.8	2
39	18	2	2	2	1	5	5	3	1	2	6	6	5	6	5	5	2	2	5.6	2
40	19	2	2	2	0	4	-4	0	0	2	3	3	4	4	5	4	2	4	3.8	1
41	20	2	2	2	1	7	7	5	0.5	2	6	6	6	6	5	4	2	2	5.8	2
42	19	2	2	2	1	6	6	5	1	1	4	4	4	4	4	4	1	4	4	1
43	19	2	2	2	1	4	4	3	0.5	2	5	5	5	5	4	2	2	3	4.8	2
44	18	2	2	2	1	4	4	6	1	1	6	6	6	6	6	6	1	2	6	2
45	19	2	2	2	1	4	4	5	4.5	1	7	7	7	7	6	7	1	1	6.8	2
1	20	1	1	1	0	4	-4	0	0	5	3	4	4	4	3	2	5	4	3.6	1
2	18	1	1	1	0	6	-6	0	0	5	2	1	3	3	2	2	5	5	2.2	1
3	19	1	1	1	1	4	4	6	2	2	3	4	5	5	3	3	2	3	4	2
4	18	1	1	1	1	5	5	6	2.5	3	3	3	4	5	3	4	3	3	3.6	1
5	20	1	1	1	1	4	4	7	1	4	1	1	4	4	1	2	4	4	2.2	1
6	18	1	1	1	0	4	-4	0	0	4	3	4	4	4	5	4	4	4	4	1
7	20	1	1	1	1	7	7	6	1	5	6	6	6	6	4	5	5	2	5.6	2
8	20	1	1	1	1	4	4	3	0.5	4	2	2	4	4	2	2	4	4	2.8	1
9	20	1	1	1	1	4	4	3	1	5	3	3	4	4	3	1	5	4	3.4	1
10	19	1	1	1	1	7	7	5	3	4	2	2	4	4	2	3	4	4	2.8	1
11	19	1	1	1	1	3	3	4	0.5	5	4	3	4	4	4	4	5	4	3.8	1
12	19	1	1	1	1	5	5	5	1	4	4	4	4	4	4	4	4	4	4	2
13	19	1	1	1	0	1	-1	0	0	5	3	3	4	4	4	4	5	4	3.6	1
14	19	1	1	1	1	2	2	3	0	3	2	2	4	4	4	2	3	4	3.2	1
15	20	1	1	1	1	4	4	4	1	4	3	3	3	5	2	2	4	3	3.2	1
16	21	1	1	1	1	7	7	7	2	4	4	3	4	4	4	3	4	4	3.8	1
17	19	1	1	1	0	5	-5	0	0	3	4	6	5	5	4	3	3	3	4.8	2
18	24	1	1	1	0	4	-4	0	0	4	5	5	5	5	5	4	4	3	5	2
19	28	1	1	1	0	5	-5	0	0	6	3	3	4	4	2	3	6	4	3.2	1
20	22	1	1	1	1	5	-5	3	0.5	4	1	6	6	6	4	5	4	2	4.6	2
21	20	1	1	1	1	6	6	3	0	3	2	1	5	5	2	1	3	3	3	1
22	24	1	1	1	1	2	2	3	0.5	5	4	3	4	4	3	1	5	4	3.6	1
23	19	1	1	1	1	4	4	6	2	7	4	3	4	4	4	4	7	4	3.8	1
24	22	1	1	1	1	4	4	4	0.5	3	3	3	5	5	3	1	3	3	3.8	1
25	20	1	1	1	1	5	5	5	0.5	4	3	4	4	4	3	3	4	4	3.6	1
26	19	1	1	1	1	5	5	3	0	4	3	2	4	4	3	2	4	4	3.2	1
27	19	1	1	1	1	5	5	3	2	5	2	1	3	3	2	1	5	5	2.2	1
28	20	1	1	1	1	6	6	2	0.5	5	2	4	2	3	5	2	5	5	3.2	1
29	18	1	1	1	1	5	5	5	2	5	2	2	3	3	3	3	5	5	2.6	1
30	18	1	1	1	0	5	-5	0	0	4	3	2	4	3	4	4	4	5	3.2	1
31	18	1	1	1	1	4	4	6	2	5	3	3	5	3	3	3	5	5	3.4	1
32	19	1	1	1	0	5	-5	0	0	4	3	4	4	4	4	4	4	4	3.8	1
33	18	1	1	1	1	4	4	3	1	4	2	1	5	4	2	1	4	4	2.8	1
34	19	1	1	1	0	3	-3	0	0	4	4	5	5	5	5	4	4	3	4.8	2
35	17	1	1	1	1	5	5	7	3	3	4	4	5	4	5	5	3	4	4.4	2
36	18	1	1	1	1	6	6	6	3	5	6	3	6	7	6	6	5	1	5.6	2
37	19	1	1	1	1	3	3	5	1	4	4	3	4	4	3	2	4	4	3.6	1
38	18	1	1	1	1	6	6	6	3	2	4	5	4	4	4	3	2	4	4.2	2
39	18	1	1	1	1	5	5	5	0.5	3	4	4	3	3	4	4	3	5	3.6	1
40	18	1	1	1	1	4	4	6	3	4	3	3	3	4	3	3	4	4	3.2	1
41	18	1	1	1	1	6	6	7	2	3	5	6	2	3	5	3	3	5	4.2	2
1	18	1	1	2	1	5	5	6	0	2	3	4	5	4	5	3	2	4	4.2	2
2	21	1	1	2	0	5	-5	0	0	4	3	7	7	5	6	4	4	3	5.6	2
3	19	1	1	2	1	7	7	4	0	2	2	2	2	2	3	2	2	6	2.2	1
4	20	1	1	2	1	5	5	6	4.5	1	4	4	3	6	5	5	1	2	4.4	2
5	18	1	1	2	0	6	-6	0	0	2	2	3	3	3	3	2	2	5	2.8	1
6	19	1	1	2	1	5	5	7	3	1	5	5	3	4	4	4	1	4	4.2	2
7	20	1	1	2	1	5	5	5	1	4	2	4	4	3	3	3	4	5	3.2	1
8	19	1	1	2	1	5	5	3	0.5	2	3	5	5	5	4	1	2	3	4.4	2
9	20	1	1	2	1	5	5	4	1	1	5	3	4	4	3	4	1	4	3.8	1
10	19	1	1	2	1	6	6	6	1	4	3	3	3	3	4	3	4	5	3.2	1
11	18	1	1	2	1	5	5	7	4.5	1	3	3	5	4	3	5	1	4	3.6	1
12	18	1	1	2	0	6	-6	0	0	2	4	3	5	3	3	5	2	5	3.6	1
13	17	1	1	2	1	4	4	2	0.5	2	4	2	5	4	3	2	2	4	3.6	1
14	22	1	1	2	1	5	5	3	0.5	4	1	2	4	4	3	2	4	4	2.8	1
15	18	1	1	2	0	4	-4	0	0	2	3	2	4	4	2	2	2	4	3	1
16	18	1	1	2	0	4	-4	0	0	2	3	2	4	4	2	2	2	4	3	1
17	17	1	1	2	1	4	4	4	2	2	3	1	3	4	2	1	2	4	2.6	1
18	18	1	1	2	1	6	6	7	5.5	2	5	6	5	5	4	4	2	3	5	2
19	19	1	1	2	1	4	4	5	0.5	1	6	5	6	5	4	4	1	3	5.2	2
20	20	1	1	2	0	6	-6	0	0	1	4	3	3	4	4	4	1	4	3.6	1
21	18	1	1	2	0	5	-5	0	0	2	1	2	4	4	4	2	2	4	3	1
22	20	1	1	2	0	4	-4	0	0	3	4	4	4	4	4	4	3	4	4	1
23	20	1	1	2	0	6	-6	0	0	1	4	2	5	6	2	3	1	2	3.8	1
24	19	1	1	2	1	6	6	4	0.5	2	2	3	6	6	2	2	2	2	3.8	1
25	19	1	1	2	0	2	-2	0	0	2	2	3	4	6	3	2	2	2	3.6	1
26	21	1	1	2	1	5	5	5	2	3	4	4	5	3	4	4	3	5	4	2
27	19	1	1	2	0	6	-6	0	0	1	3	2	3	5	3	2	1	3	3.2	1
28	20	1	1	2	0	6	-6	0	0	4	4	4	4	4	4	4	4	4	4	1
29	19	1	1	2	1	5	5	5	0.5	3	4	4	5	5	4	3	3	3	4.4	2
30	20	1	1	2	0	4	-4	0	0	2	3	5	5	5	4	3	2	3	4.4	2
31	20	1	1	2	1	5	5	5	2	2	4	3	3	3	2	3	2	5	3	1
32	20	1	1	2	1	4	4	5	0.5	2	4	2	5	6	4	4	2	2	4.2	2
33	19	1	1	2	1	4	4	5	0.5	4	2	3	3	3	5	3	4	5	3.2	1
34	20	1	1	2	0	4	-4	0	0	5	2	2	4	4	2	1	5	4	2.8	1
35	20	1	1	2	0	5	-5	0	0	2	3	3	5	4	3	5	2	4	3.6	1
36	20	1	1	2	1	4	4	4	1	1	4	3	5	5	3	3	1	3	4	2
37	20	1	1	2	1	3	3	3	0	2	3	3	5	5	3	3	2	3	3.8	1
38	20	1	1	2	1	6	6	4	2	1	6	5	3	6	5	4	1	2	5	2
39	19	1	1	2	1	2	2	7	3	1	2	2	5	5	4	3	1	3	3.6	1
40	20	1	1	2	1	7	7	6	0	1	4	5	6	6	5	4	1	2	5.2	2
41	21	1	1	2	0	4	-4	0	0	1	4	4	4	4	4	3	1	4	4	1
42	20	1	1	2	0	4	-4	0	0	4	3	4	4	4	3	3	4	4	3.6	1
1	20	1	2	1	1	3	3	5	4.5	4	4	4	5	4	3	4	4	4	4	2
2	20	1	2	1	1	4	4	5	0	5	2	2	4	5	3	2	5	3	3.2	1
3	19	1	2	1	0	6	-6	0	0	3	3	3	5	5	4	4	3	3	4	1
4	19	1	2	1	1	4	4	3	1	5	4	3	5	5	2	2	5	3	3.8	1
5	19	1	2	1	1	4	4	6	1	6	3	3	5	5	3	4	6	3	3.8	1
6	20	1	2	1	0	4	-4	0	0	6	2	2	4	4	1	1	6	4	2.6	1
7	18	1	2	1	1	4	4	6	1.5	4	4	3	4	5	2	6	4	3	3.6	1
8	20	1	2	1	1	6	6	6	0	3	4	4	4	4	4	3	3	4	4	2
9	19	1	2	1	1	4	4	4	1	4	5	4	6	6	5	4	4	2	5.2	2
10	20	1	2	1	1	7	7	4	0.5	2	5	5	6	6	6	5	2	2	5.6	2
11	19	1	2	1	0	4	-4	0	0	1	4	4	4	4	4	4	1	4	4	1
12	19	1	2	1	1	4	4	5	5.5	4	4	4	4	4	4	4	4	4	4	2
13	20	1	2	1	1	4	4	6	4.5	4	4	4	4	4	4	4	4	4	4	1
14	19	1	2	1	0	7	-7	0	0	4	2	3	6	6	2	3	4	2	3.8	1
15	19	1	2	1	0	4	-4	0	0	5	4	3	3	3	3	4	5	5	3.2	1
16	20	1	2	1	1	7	7	6	1	1	7	4	7	7	3	7	1	1	5.6	2
17	18	1	2	1	1	7	7	3	0	5	5	4	5	5	3	3	5	3	4.4	2
18	18	1	2	1	0	4	-4	0	0	5	3	3	4	4	4	4	5	4	3.6	1
19	19	1	2	1	1	6	6	4	0.5	5	4	4	5	5	4	2	5	3	4.4	2
20	20	1	2	1	1	5	5	4	0.5	5	3	4	5	4	2	1	5	4	3.6	1
21	20	1	2	1	1	4	4	4	1	2	5	5	3	6	4	6	2	2	4.6	2
22	20	1	2	1	1	7	7	7	3	3	4	4	5	5	5	6	3	3	4.6	2
23	18	1	2	1	1	6	6	5	1	5	1	3	5	5	2	1	5	3	3.2	1
24	20	1	2	1	0	6	-6	0	0	4	4	5	4	4	3	2	4	4	4	2
25	18	1	2	1	0	5	-5	0	0	4	3	3	4	4	2	2	4	4	3.2	1
26	20	1	2	1	0	4	-4	0	0	2	4	3	6	5	3	5	2	3	4.2	2
27	18	1	2	1	1	6	6	7	2	6	4	5	4	4	4	3	6	4	4.2	2
28	20	1	2	1	1	4	4	3	0.5	5	4	3	4	4	3	2	5	4	3.6	1
29	18	1	2	1	0	5	-5	0	0	3	4	3	4	4	3	6	3	4	3.6	1
30	19	1	2	1	0	3	-3	0	0	1	3	4	5	5	2	5	1	3	3.8	1
31	19	1	2	1	1	5	5	5	1	3	4	3	5	4	3	3	3	4	3.8	1
32	18	1	2	1	1	5	5	5	0	1	4	4	4	4	4	1	1	4	4	1
33	19	1	2	1	1	5	5	6	0	4	4	4	4	4	4	4	4	4	4	2
34	19	1	2	1	1	5	5	5	0.5	6	5	4	5	4	3	5	6	4	4.2	2
35	18	1	2	1	1	4	4	5	6.5	3	4	5	4	4	4	4	3	4	4.2	2
36	18	1	2	1	0	5	-5	0	0	2	3	3	5	5	4	4	2	3	4	1
37	19	1	2	1	1	7	7	6	6	1	7	7	7	7	4	7	1	1	6.4	2
38	18	1	2	1	1	7	7	5	1.5	5	2	3	3	3	3	1	5	5	2.8	1
39	19	1	2	1	0	4	-4	0	0	3	3	3	3	3	3	3	3	5	3	1
40	19	1	2	1	1	5	5	3	2	3	3	5	5	5	4	5	3	3	4.4	2
1	17	1	2	2	1	7	7	5	1	1	6	5	6	5	6	7	1	3	5.6	2
2	20	1	2	2	1	4	4	4	1	1	3	5	5	5	5	3	1	3	4.6	2
3	19	1	2	2	1	6	6	3	0.5	1	7	5	5	5	5	5	1	3	5.4	2
4	18	1	2	2	1	6	6	4	0	2	2	1	6	6	4	3	2	2	3.8	1
5	18	1	2	2	1	6	6	5	0	1	2	2	5	4	4	3	1	4	3.4	1
6	18	1	2	2	0	1	-1	0	0	3	1	2	5	4	3	6	3	4	3	1
7	19	1	2	2	1	5	5	6	0	3	4	4	2	3	6	5	3	5	3.8	1
8	18	1	2	2	0	5	-5	0	0	2	4	4	4	4	5	5	2	4	4.2	2
9	17	1	2	2	1	6	6	7	4	1	7	7	6	5	4	6	1	3	5.8	2
10	19	1	2	2	0	5	-5	0	0	4	4	4	5	5	5	4	4	3	4.6	2
11	20	1	2	2	0	5	-5	0	0	1	5	5	4	3	5	4	1	5	4.4	2
12	19	1	2	2	0	7	-7	0	0	2	3	3	5	5	3	3	2	3	3.8	1
13	18	1	2	2	1	7	7	7	2	2	6	6	6	6	6	4	2	2	6	2
14	19	1	2	2	1	5	5	6	2.5	1	5	5	4	5	5	5	1	3	4.8	2
15	20	1	2	2	1	5	5	4	0.5	2	5	5	5	5	5	4	2	3	5	2
16	18	1	2	2	1	4	4	9	7	1	7	6	7	7	5	5	1	1	6.4	2
17	19	1	2	2	1	7	7	5	0	2	7	3	6	7	2	7	2	1	5	2
18	21	1	2	2	1	7	7	3	0.5	1	4	3	5	5	3	2	1	3	4	2
19	19	1	2	2	1	7	7	2	0	1	3	3	4	4	2	7	1	4	3.2	1
20	19	1	2	2	1	3	3	3	0	1	4	5	6	6	5	3	1	2	5.2	2
21	18	1	2	2	0	6	-6	0	0	4	5	5	5	4	6	6	4	4	5	2
22	19	1	2	2	1	7	7	4	0.5	3	2	2	5	5	4	1	3	3	3.6	1
23	20	1	2	2	1	7	7	5	0.5	1	3	2	4	4	4	3	1	4	3.4	1
24	19	1	2	2	1	3	3	5	1	2	4	6	7	6	2	3	2	2	5	2
25	19	1	2	2	1	5	5	5	0	1	5	5	6	6	6	6	1	2	5.6	2
26	20	1	2	2	0	3	-3	0	0	3	3	4	6	6	5	7	3	2	4.8	2
27	19	1	2	2	1	7	7	4	1	3	3	3	5	4	4	3	3	4	3.8	1
28	20	1	2	2	1	7	7	3	1	1	2	3	4	4	4	2	1	4	3.4	1
29	19	1	2	2	0	7	-7	0	0	1	7	7	1	7	7	7	1	1	5.8	2
30	22	1	2	2	1	5	5	6	1	2	4	4	5	5	5	2	2	3	4.6	2
31	26	1	2	2	1	7	7	6	7	1	1	1	4	6	4	1	1	2	3.2	1
32	22	1	2	2	1	7	7	6	2	1	5	6	4	4	5	5	1	4	4.8	2
33	24	1	2	2	1	6	6	5	2	2	5	5	5	4	5	4	2	4	4.8	2
34	23	1	2	2	0	5	-5	0	0	4	5	5	4	4	5	4	4	4	4.6	2
35	22	1	2	2	1	5	5	5	0.5	2	3	5	4	4	3	4	2	4	3.8	1
36	29	1	2	2	1	7	7	3	0.5	3	2	5	5	5	4	5	3	3	4.2	2
37	20	1	2	2	1	4	4	3	0	1	7	7	4	4	5	3	1	4	5.4	2
38	20	1	2	2	0	4	-4	0	0	1	5	5	5	5	5	6	1	3	5	2
39	20	1	2	2	0	5	-5	0	0	3	3	2	5	4	2	1	3	4	3.2	1
40	18	1	2	2	1	4	4	3	1	1	4	5	6	6	4	4	1	2	5	2
41	20	1	2	2	1	5	5	4	0.5	2	5	4	6	6	4	5	2	2	5	2
